# Supplementary material for: Knowledge, Attitude, and Prescription Practice on Antimicrobials Use Among Physicians: A Cross-Sectional Study in Eastern China
Source: PubMed Central journal article supplement — Inquiry. 2021 Dec 7;58:00469580211059984. doi: 10.1177/00469580211059984 (PMC8661115; doi:10.1177/00469580211059984), 2021-12-07
Supplement: sj-pdf-2-inq-10.1177_00469580211059984.pdf [file sj-pdf-2-inq-10.1177_00469580211059984.pdf]

Supplementally Table 2. The average score of knowledge, attitude and practice based on demographics

| Variables                             | Total (%)   | Ignorance    | Avoidance of responsibility | Fear       | Complacency | Prescription behavior | Medication education | Self-learning | Knowledge  | Prescribe antimicrobials for URIs |
|---------------------------------------|-------------|--------------|-----------------------------|------------|-------------|-----------------------|----------------------|---------------|------------|-----------------------------------|
| <b>Gender</b>                         |             |              |                             |            |             |                       |                      |               |            |                                   |
| Female                                | 252 (43.45) | 2.32±1.65    | -5.10±2.46                  | 10.56±2.18 | 7.43±1.71   | 13.09±2.19            | 11.48±2.45           | 7.01±1.63     | 6.56±1.89  | 3.22±1.99                         |
| Male                                  | 328 (56.55) | 2.93±1.62    | -4.98±2.39                  | 10.26±2.36 | 7.31±1.81   | 13.10±2.35            | 11.76±2.25           | 6.95±1.56     | 6.99±1.80  | 3.19±2.10                         |
| <b>Age group</b>                      |             |              |                             |            |             |                       |                      |               |            |                                   |
| ≥40                                   | 322 (55.52) | 2.60±1.66    | -4.98±2.20                  | 10.51±2.15 | 7.40±1.74   | 13.09±2.16            | 11.40±2.06           | 6.81±1.57     | 6.72±1.44  | 3.23±1.94                         |
| < 40                                  | 258 (44.48) | 2.28±1.54    | -5.05±2.42                  | 10.17±2.19 | 7.13±1.66   | 12.82±2.14            | 11.14±1.95           | 6.81±1.54     | 6.29±1.72  | 3.51±2.03                         |
| <b>Level of education</b>             |             |              |                             |            |             |                       |                      |               |            |                                   |
| High vocational training and below    | 146 (25.17) | 2.35±1.67    | -4.90±2.46                  | 10.23±2.47 | 7.07±1.90   | 12.85±2.34            | 11.27±2.56           | 6.67±1.72     | 6.178±1.93 | 3.34±2.24                         |
| Bachelor degree and above             | 434 (74.83) | 2.77±1.64    | -5.08±2.40                  | 10.44±2.22 | 7.47±1.70   | 13.18±2.26            | 11.76±2.25           | 7.08±1.53     | 7.02±1.77  | 3.16±1.99                         |
| <b>Professional title</b>             |             |              |                             |            |             |                       |                      |               |            |                                   |
| Junior doctor                         | 229 (39.48) | 2.17±1.59    | -4.95±2.70                  | 10.41±2.53 | 7.21±1.84   | 12.86±2.40            | 11.28±2.57           | 6.74±1.69     | 5.98±2.06  | 3.43±2.23                         |
| Attending doctor                      | 188 (32.34) | 2.73±1.68    | -5.27±2.34                  | 10.30±2.20 | 7.26±1.69   | 13.00±2.17            | 11.82±2.19           | 6.96±1.50     | 7.06±1.50  | 3.18±1.97                         |
| Associate senior or senior consultant | 163 (28.10) | 3.28±1.52    | -4.88±2.05                  | 10.45±2.02 | 7.71±1.70   | 13.53±2.18            | 11.94±2.10           | 7.33±1.49     | 7.67±1.36  | 2.93±1.86                         |
| <b>Clinical experience (years)</b>    |             |              |                             |            |             |                       |                      |               |            |                                   |
| ≥18                                   | 304 (52.41) | 2.99±1.64    | -5.01±2.20                  | 10.62±2.07 | 7.57±1.69   | 13.33±2.13            | 12.03±2.02           | 7.16±1.55     | 7.28±1.44  | 2.94±1.93                         |
| < 18                                  | 276 (47.59) | 2.31±1.61    | -5.07±2.64                  | 10.13±2.48 | 7.14±1.81   | 12.84±2.42            | 11.21±2.59           | 6.78±1.62     | 6.29±2.09  | 3.49±2.14                         |
| <b>Medical sub-specialization</b>     |             |              |                             |            |             |                       |                      |               |            |                                   |
| General practitioner                  | 356 (61.38) | 2.61±1.62167 | -5.20±2.33                  | 10.18±2.33 | 7.12±1.76   | 12.81±2.22            | 11.67±2.20           | 6.86±1.50     | 6.85±1.81  | 3.28±2.02                         |
| Chinese medical practitioner          | 63 (10.86)  | 2.68±1.72    | -4.90±2.81                  | 11.19±2.37 | 7.87±1.62   | 13.56±1.99            | 11.86±2.80           | 7.19±1.90     | 6.48±1.86  | 3.06±2.24                         |
| Other                                 | 161 (27.76) | 2.78±1.73    | -4.71±2.43                  | 10.53±2.07 | 7.71±1.74   | 13.55±2.43            | 11.50±2.45           | 7.15±1.65     | 6.85±1.93  | 3.09±2.07                         |
| <b>Training times</b>                 |             |              |                             |            |             |                       |                      |               |            |                                   |
| 0                                     | 43 (7.41)   | 1.49±1.53    | -4.60±2.93                  | 10±3.27    | 6.81±2.16   | 12.21±3.41            | 10.49±3.05           | 6.47±1.92     | 4.88±1.97  | 3.81±2.68                         |
| 1                                     | 71 (12.24)  | 2.34±1.90    | -5.47±2.44                  | 9.76±2.31  | 6.80±1.75   | 12.76±2.44            | 11.23±2.61           | 6.51±1.70     | 5.86±1.91  | 3.89±2.42                         |

|                             |             |           |            |            |           |            |            |           |           |           |
|-----------------------------|-------------|-----------|------------|------------|-----------|------------|------------|-----------|-----------|-----------|
| 2                           | 75 (12.93)  | 2.43±1.40 | -4.93±2.41 | 10.38±2.28 | 7.01±1.74 | 12.67±2.09 | 11.09±2.23 | 6.75±1.56 | 6.56±1.76 | 3.56±2.07 |
| ≥3                          | 391 (67.41) | 2.90±1.60 | -5.02±2.35 | 10.54±2.13 | 7.60±1.68 | 13.34±2.09 | 11.95±2.15 | 7.16±1.51 | 7.24±1.63 | 2.95±1.84 |
| <b>Types of institutes</b>  |             |           |            |            |           |            |            |           |           |           |
| Primary health institutions | 348 (60.00) | 2.51±1.56 | -4.95±2.37 | 10.45±2.39 | 7.20±1.77 | 12.93±2.30 | 11.47±2.44 | 6.82±1.67 | 6.34±1.87 | 3.20±2.08 |
| Country hospital            | 232 (40.00) | 2.89±1.77 | -5.12±2.48 | 10.30±2.12 | 7.62±1.72 | 13.34±2.23 | 11.90±2.15 | 7.22±1.43 | 7.51±1.57 | 3.22±2.01 |
| <b>Income</b>               |             |           |            |            |           |            |            |           |           |           |
| ≤4000                       | 125 (21.55) | 2.06±1.60 | -4.86±2.67 | 10.39±2.63 | 7.10±1.95 | 12.87±2.34 | 11.38±2.62 | 6.70±1.71 | 5.96±2.04 | 3.22±2.09 |
| 4001-6000                   | 223 (38.45) | 2.60±1.67 | -5.02±2.45 | 10.54±2.19 | 7.43±1.64 | 13.14±2.27 | 11.44±2.35 | 6.84±1.50 | 6.74±1.73 | 3.23±2.09 |
| 6001-8000                   | 132 (22.76) | 2.83±1.54 | -5.50±2.42 | 10.12±2.19 | 7.30±1.66 | 13.08±2.14 | 11.98±1.95 | 7.29±1.54 | 7.14±1.72 | 3.30±2.03 |
| ≥8001                       | 100 (17.24) | 3.34±1.58 | -4.68±1.89 | 10.38±2.15 | 7.65±1.88 | 13.28±2.43 | 11.95±2.34 | 7.23±1.63 | 7.57±1.58 | 3.00±1.97 |
| <b>Total</b>                | 580 (100)   | 2.66±1.66 | -5.03±2.42 | 10.39±2.29 | 7.37±1.76 | 13.09±2.28 | 11.64±2.34 | 6.98±1.59 | 6.81±1.85 | 3.21±2.05 |

---
